# Supplementary material for: Metformin ameliorates insulitis in STZ-induced diabetic mice
Source: PeerJ. 2017 Apr 13;5:e3155. doi: 10.7717/peerj.3155 (PMC5399881; doi:10.7717/peerj.3155)
Supplement: Data S1 [file peerj-05-3155-s002.xlsx]

## Sheet: Pancreas insulin
Pancreas insulin level (μIU/ml)
db/db	db/db+Met
343.388	323.994
383.035	298.391
288.168	364.023
366.221	379.691
249.001	298.391
315.396	339.853
338.038	361.253
368.8	328.866

## Sheet: Serum insulin
Serum insulin level (μIU/ml)
db/db	db/db+Met
7.301	7.462
6.543	9.542
6.988	8.922
9.544	9.321
6.211	5.987
5.765	6.533
6.754	7.095
7.043	6.447
